# Supplementary material for: Metabolome and Transcriptome Reveal Novel Formation Mechanism of Early Mature Trait in Kiwifruit (Actinidia eriantha)
Source: PubMed Central journal article supplement (PMC8640357; doi:10.3389/fpls.2021.760496), 2021-11-19

Supplementary Figure 1 Dynamic change characteristics of ratio of endogenous hormone content of between ‘Ganlv 2’ and ‘Ganlv 1’. (\* represents that there are significant differences between different cultivars at same period,  $P \leq 0.05$ ).

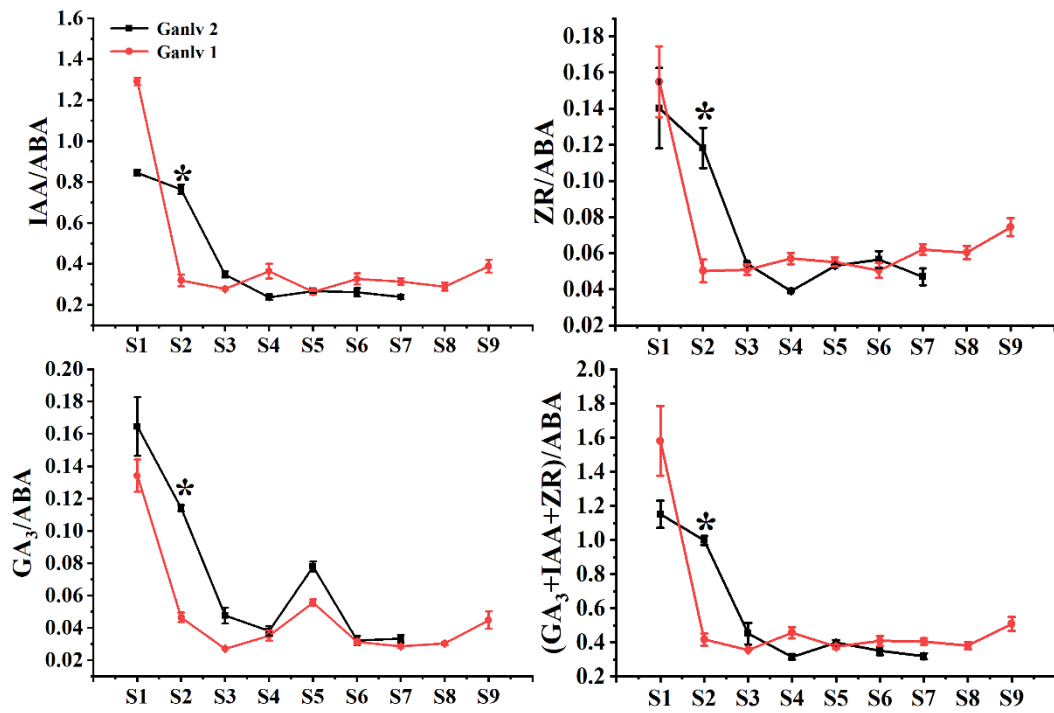

Supplement: Image_1.pdf [file Image_1.pdf]
