# Supplementary material for: Metabolome and Transcriptome Reveal Novel Formation Mechanism of Early Mature Trait in Kiwifruit (Actinidia eriantha)
Source: PubMed Central journal article supplement (PMC8640357; doi:10.3389/fpls.2021.760496), 2021-11-19

Supplementary Figure 2 Partial least squares-discriminant analysis (OPLS-DA) of different comparison groups in POS (a) and NEG mode (b).

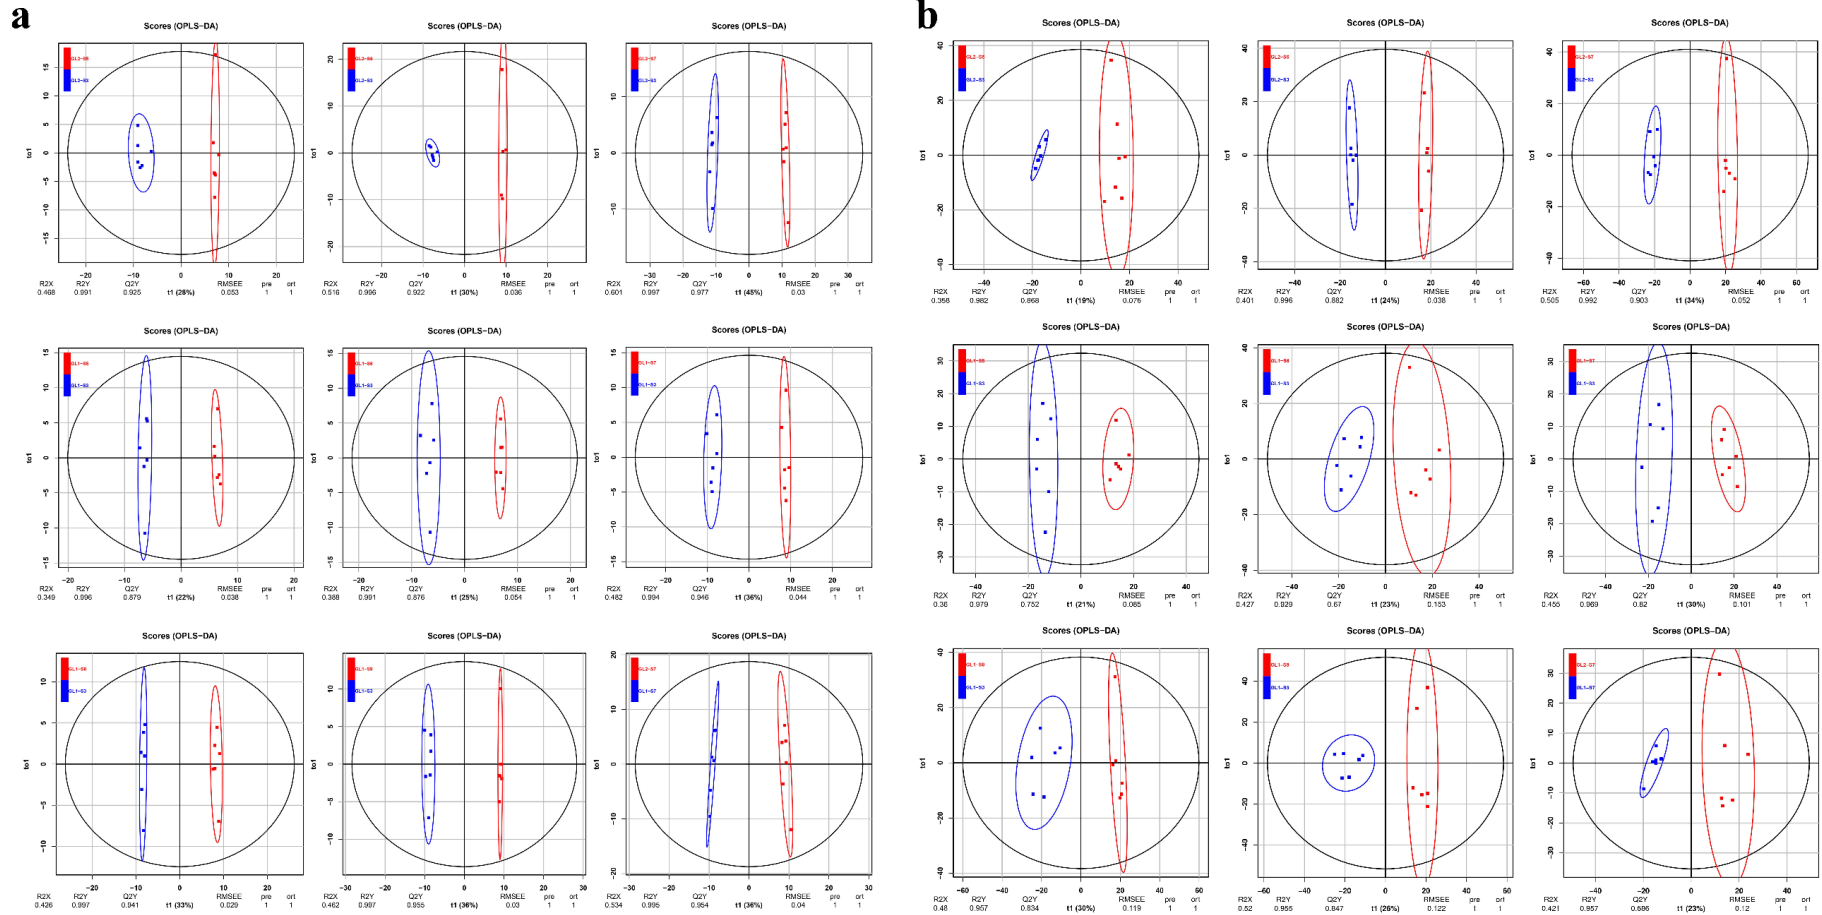

Supplement: Image_2.pdf [file Image_2.pdf]
