# Supplementary material for: Metabolome and Transcriptome Reveal Novel Formation Mechanism of Early Mature Trait in Kiwifruit (Actinidia eriantha)
Source: PubMed Central journal article supplement (PMC8640357; doi:10.3389/fpls.2021.760496), 2021-11-19

Supplementary Figure 3 OPLS-DA model permutation test analysis of different comparison groups in POS (a) and NEG mode (b). The intersection point of the regression line on the ordinate is  $\leq 0$ , which indicates that the prediction result of the model is reliable.

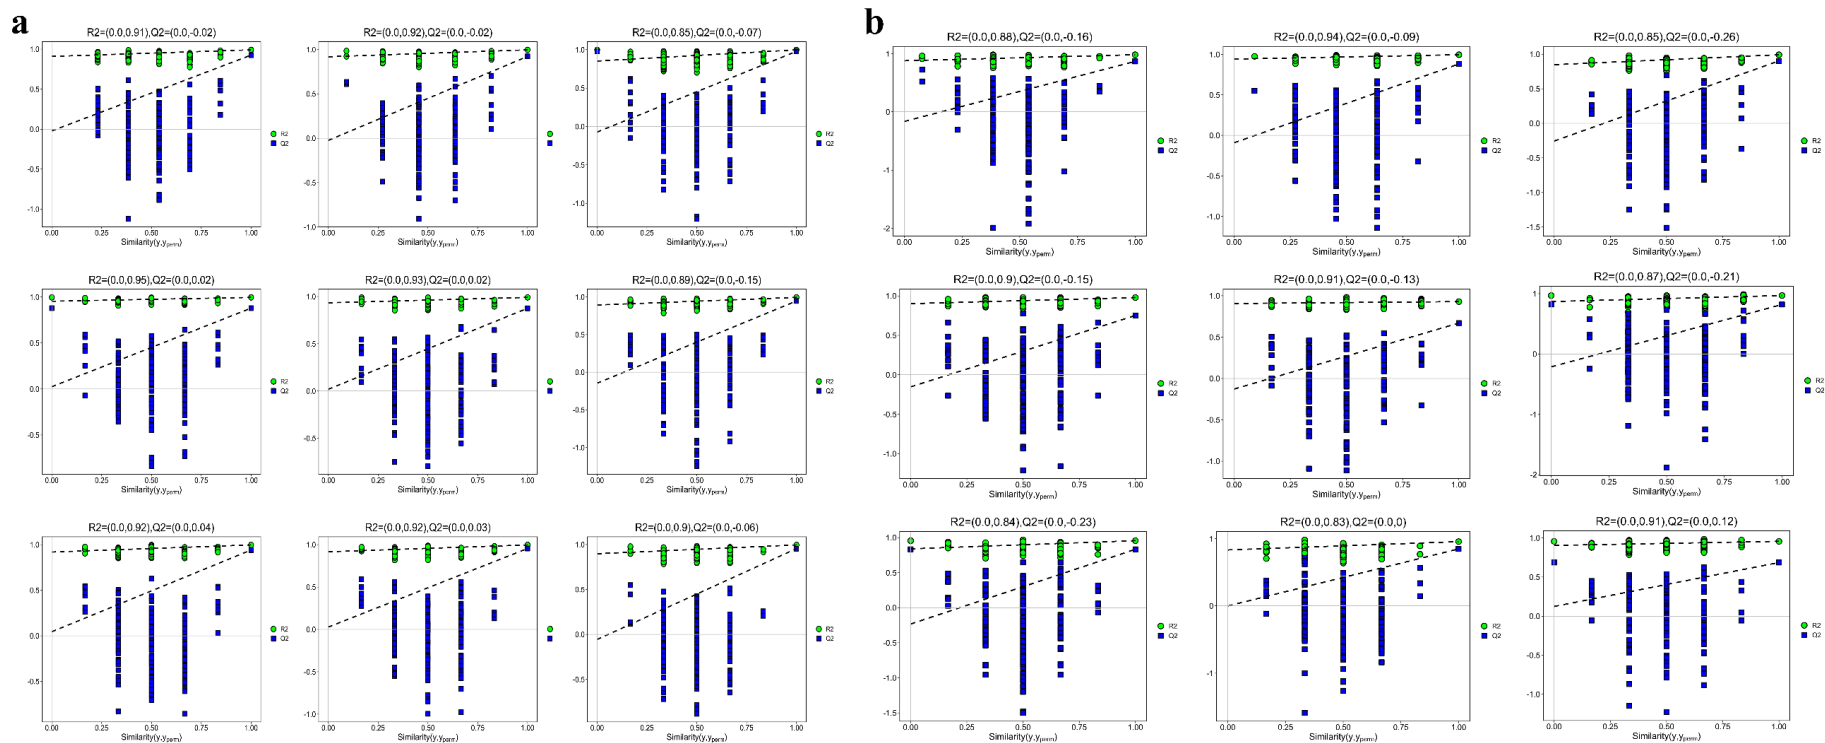

Supplement: Image_3.pdf [file Image_3.pdf]
