# Supplementary material for: Metabolome and Transcriptome Reveal Novel Formation Mechanism of Early Mature Trait in Kiwifruit (Actinidia eriantha)
Source: PubMed Central journal article supplement (PMC8640357; doi:10.3389/fpls.2021.760496), 2021-11-19

Supplementary Figure 4 Analysis of maturation-related DEGs. Venn analysis of co-expressed DEGs (a), GO enrichment analysis (b), GO classification analysis (c), KEGG enrichment analysis (d), KEGG classification analysis (e).

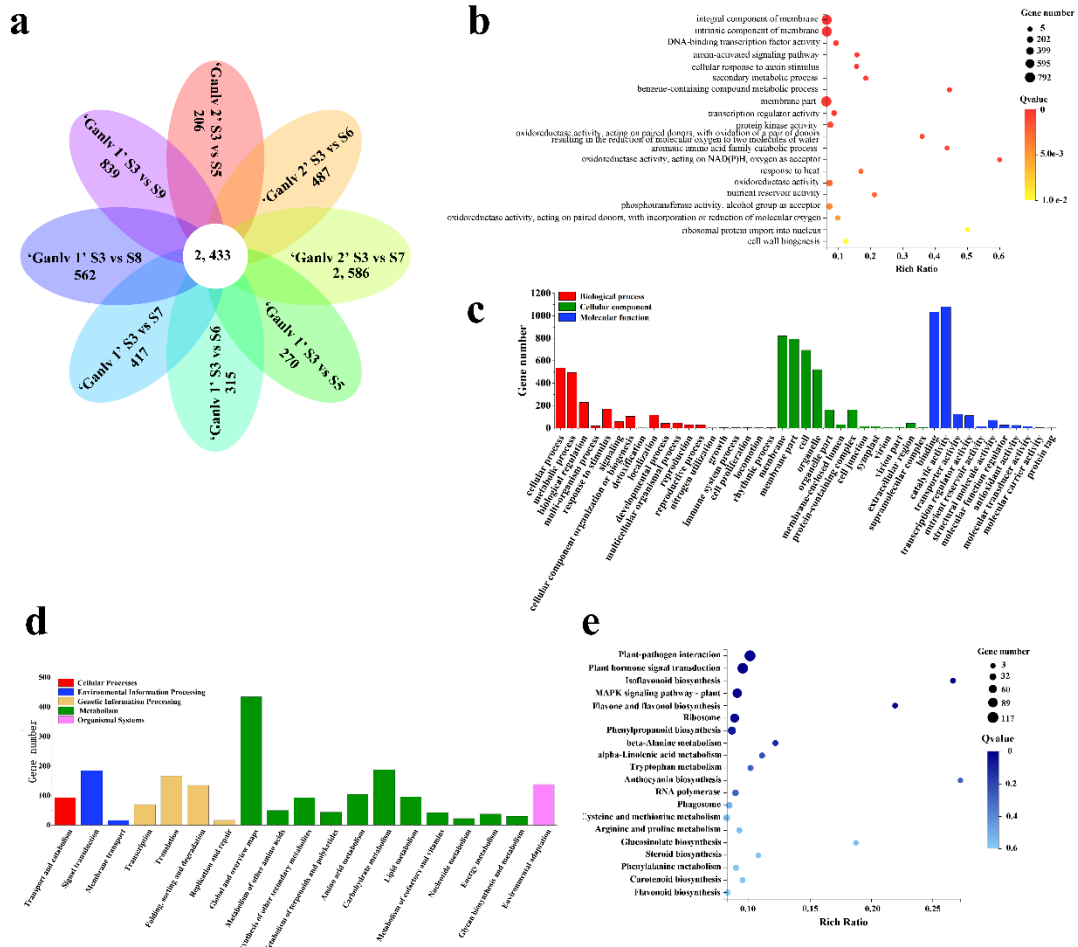

Supplement: Image_4.pdf [file Image_4.pdf]
