# Supplementary material for: Metabolome and Transcriptome Reveal Novel Formation Mechanism of Early Mature Trait in Kiwifruit (Actinidia eriantha)
Source: PubMed Central journal article supplement (PMC8640357; doi:10.3389/fpls.2021.760496), 2021-11-19

Supplementary Figure 5 Analysis of DEGs related formation and regulation of early mature trait. Venn analysis of co-expressed DEGs (a), GO enrichment analysis (b), GO classification analysis (c), KEGG enrichment analysis (d), KEGG classification analysis (e).

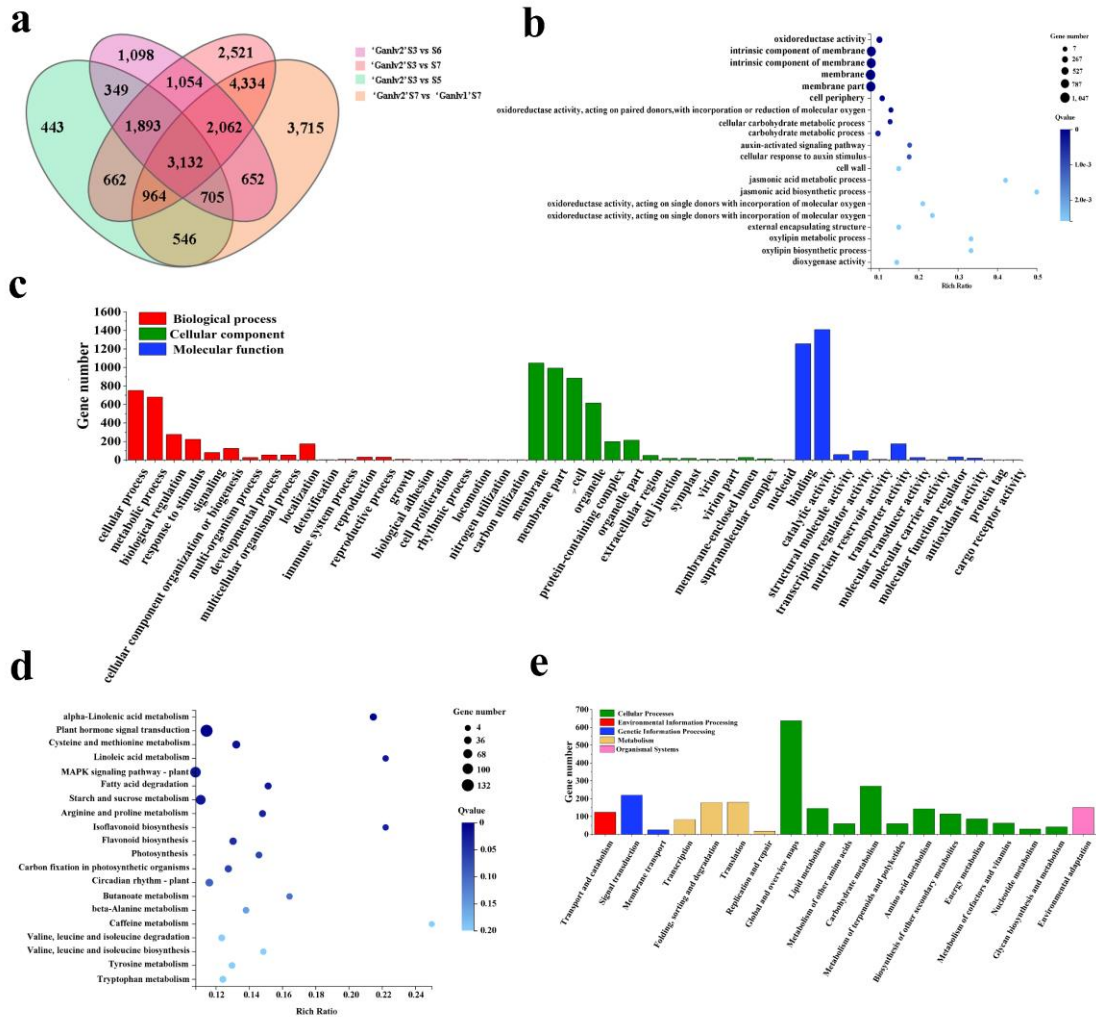

Supplement: Image_5.pdf [file Image_5.pdf]
